# Supplementary material for: Beneficial Exercises for Cancer-Related Fatigue among Women with Breast Cancer: A Systematic Review and Network Meta-Analysis
Source: MDPI journal article supplement (doi:10.3390/cancers15010151), 2022-12-27
Supplement: s1 [file s1]

## S2 1 Searching strategies of four databases

| Database      | # | Searching Strategy                                                                                                                                                                                                                                                                                                        | Results |
|---------------|---|---------------------------------------------------------------------------------------------------------------------------------------------------------------------------------------------------------------------------------------------------------------------------------------------------------------------------|---------|
| 1)<br>Embase  | 1 | (Mastectomy OR ((breast OR mamma*) NEAR/3 (cancer* OR neopla* OR adenocarcin* OR carcin* OR tumor* OR tumour* OR malignan* OR sarcoma* OR mass* OR DCIS OR ductal* OR infiltrat* OR intraductal* OR lobula* OR medullary)))):ti,ab,kw,de                                                                                  | 585528  |
|               | 2 | "breast tumor"/exp OR Mastectomy/exp                                                                                                                                                                                                                                                                                      | 502000  |
|               | 3 | (Exercis* OR kinesio* OR sport* OR training* OR yoga OR "tai chi" OR "meditative movement" OR aerobic* OR danc* OR strength* OR walk* OR jog* OR bicycl* OR swimming OR pilates OR (physical NEAR/3 (activit* OR conditioning* OR effort* OR exertion* OR endurance* OR restraint* or movement*)))):ti,ab,kw,de           | 1783392 |
|               | 4 | Exercise/exp OR kinesiotherapy/exp OR "physical activity"/exp OR sport/exp OR training/exp OR dancing/exp OR "muscle strength"/exp                                                                                                                                                                                        | 791775  |
|               | 5 | (Fatigue* OR Tired* OR Lassitude OR Exhausti* OR weary OR weariness):ti,ab,kw,de                                                                                                                                                                                                                                          | 274920  |
|               | 6 | Fatigue/exp "Fatigue Severity Scale"/exp OR "Fatigue Impact Scale"/exp                                                                                                                                                                                                                                                    | 1821    |
|               | 7 | (#1 OR #2) AND (#3 OR #4) AND (#5 OR #6)                                                                                                                                                                                                                                                                                  | 1752    |
|               | 8 | #7 AND [embase]/lim                                                                                                                                                                                                                                                                                                       | 1601    |
|               | 9 | #8 AND ('crossover procedure':de OR 'double-blind procedure':de OR 'randomized controlled trial':de OR 'single-blind procedure':de OR (random* OR factorial* OR crossover* OR cross NEXT/1 over* OR placebo* OR doubl* NEAR/1 blind* OR singl* NEAR/1 blind* OR assign* OR allocat* OR volunteer*):de,ab,ti)              | 648     |
| 2)<br>Medline | 1 | (Malignan* OR Mastectomy OR ((breast OR mamma*) ADJ4 (cancer* OR neopla* OR adenocarcin* OR carcin* OR tumor* OR tumour* OR malignan* OR sarcoma* OR mass* OR DCIS OR ductal* OR infiltrat* OR intraductal* OR lobula* OR medullary)))):mp                                                                                | 871345  |
|               | 2 | exp "Breast Neoplasms"/ OR exp "Oncology nursing"/ OR exp Mastectomy/                                                                                                                                                                                                                                                     | 278338  |
|               | 3 | (Exercis* OR kinesio* OR sport* OR training* OR "weight training" OR yoga OR "tai chi" OR "meditative movement" OR aerobic* OR danc* OR strength* OR walk* OR jog* OR bicycl* OR swimming OR pilates OR (physical ADJ4 (activit* OR conditioning* OR effort* OR exertion* OR endurance* OR restraint* or movement*)))):mp | 1331543 |
|               | 4 | exp Exercise/ OR exp "Exercise Therapy"/ OR exp Sports/ OR exp "Physical Exertion"/ OR exp "Exercise Movement                                                                                                                                                                                                             | 341836  |

|               |   |                                                                                                                                                                                                                                                                                                                                                                                                                                                                            |        |
|---------------|---|----------------------------------------------------------------------------------------------------------------------------------------------------------------------------------------------------------------------------------------------------------------------------------------------------------------------------------------------------------------------------------------------------------------------------------------------------------------------------|--------|
|               |   | Techniques"/ OR exp "Physical Fitness"/ OR exp "Muscle Strength"/                                                                                                                                                                                                                                                                                                                                                                                                          |        |
|               | 5 | (Fatigue* OR Tired* OR Lassitude OR Exhausti*).mp                                                                                                                                                                                                                                                                                                                                                                                                                          | 130161 |
|               | 6 | Exp Fatigue/                                                                                                                                                                                                                                                                                                                                                                                                                                                               | 27076  |
|               | 7 | (1 OR 2) AND (3 OR 4) AND (5 OR 6)                                                                                                                                                                                                                                                                                                                                                                                                                                         | 830    |
|               | 8 | 7 and (Randomized controlled trial.pt. or controlled clinical trial.pt. or randomi*ed.ab. or placebo.ab. or drug therapy.fs. or randomly.ab. or trial.ab. or groups.ab. not (exp animals/ not humans.sh.))                                                                                                                                                                                                                                                                 | 466    |
| 3)<br>CINHAL  | 1 | Malignan* OR Mastectomy OR ((breast OR mamma*) N3 (cancer* OR neopla* OR adenocarcin* OR carcin* OR tumor* OR tumour* OR malignan* OR sarcoma* OR mass* OR DCIS OR ductal* OR infiltrat* OR intraductal* OR lobula* OR medullary))                                                                                                                                                                                                                                         | 135021 |
|               | 2 | MH ("Breast Neoplasms+" OR "Oncologic Nursing+" OR Mastectomy+)                                                                                                                                                                                                                                                                                                                                                                                                            | 84057  |
|               | 3 | Exercis* OR kinesi* OR sport* OR training* OR "weight training" OR yoga OR "tai chi" OR "meditative movement" OR aerobic* OR danc* OR strength* OR walk* OR jog* OR bicycl* OR swimming OR pilates OR (physical N3 (activit* OR conditioning* OR effort* OR exertion* OR endurance* OR restraint* or movement*))                                                                                                                                                           | 476799 |
|               | 4 | MH (Exercise+ OR "Exercise Therapy+" OR Sports+ OR "Physical Exertion+" OR "Exercise Movement Techniques+" OR "Physical Fitness+" OR "Muscle Strength+")                                                                                                                                                                                                                                                                                                                   | 162119 |
|               | 5 | Fatigue* OR Tired* OR Lassitude OR Exhausti*                                                                                                                                                                                                                                                                                                                                                                                                                               | 44456  |
|               | 6 | MH (Fatigue+)                                                                                                                                                                                                                                                                                                                                                                                                                                                              | 18675  |
|               | 7 | (s1 OR s2) AND (s3 OR s4) AND (s5 OR s6)                                                                                                                                                                                                                                                                                                                                                                                                                                   | 641    |
|               | 8 | s7 and ((MH "Clinical Trials+" or (PT Clinical trial) or (TX clinic* n1 trial*) or TX ( (singl* n1 blind*) or (singl* n1 mask*) ) or TX ( (doubl* n1 blind*) or (doubl* n1 mask*) ) or TX ( (tripl* n1 blind*) or (tripl* n1 mask*) ) or TX ( (trebl* n1 blind*) or (trebl* n1 mask*) ) or (TX randomi* control* trial*) or (MH "Random Assignment") or (TX random* allocat*) or (TX placebo*) or (MH "Placebos") or (MH "Quantitative Studies") or (TX allocat* random*)) | 420    |
| 4)<br>CENTRAL | 1 | (Malignan* OR Mastectomy OR ((breast OR mamma*) NEAR/3 (cancer* OR neopla* OR adenocarcin* OR carcin* OR tumor* OR tumour* OR malignan* OR sarcoma* OR mass* OR DCIS OR ductal* OR infiltrat* OR intraductal* OR lobula* OR medullary)))):ti,ab,kw                                                                                                                                                                                                                         | 42798  |
|               | 2 | [mh "Breast Neoplasms"] OR [mh "Oncology nursing"] OR [mh Mastectomy]                                                                                                                                                                                                                                                                                                                                                                                                      | 11353  |
|               | 3 | (Exercis* OR kinesi* OR sport* OR training* OR "weight                                                                                                                                                                                                                                                                                                                                                                                                                     | 143366 |

|  |   |                                                                                                                                                                                                                                                                           |       |
|--|---|---------------------------------------------------------------------------------------------------------------------------------------------------------------------------------------------------------------------------------------------------------------------------|-------|
|  |   | training" OR yoga OR "tai chi" OR "meditative movement" OR aerobic* OR danc* OR strength* OR walk* OR jog* OR bicycl* OR swimming OR pilates OR (physical NEAR/3 (activit* OR conditioning* OR effort* OR exertion* OR endurance* OR restraint* or movement*))) :ti,ab,kw |       |
|  | 4 | [mh Exercise] OR [mh "Exercise Therapy"] OR [mh Sports] OR [mh "Physical Exertion"] OR [mh "Exercise Movement Techniques"] OR [mh "Physical Fitness"] OR [mh "Muscle Strength"]                                                                                           | 35445 |
|  | 5 | (Fatigue* OR Tired* OR Lassitude OR Exhausti*) :ti,ab,kw                                                                                                                                                                                                                  | 25914 |
|  | 6 | [mh Fatigue]                                                                                                                                                                                                                                                              | 2991  |
|  | 7 | (#1 OR #2) AND (#3 OR #4) AND (#5 OR #6)                                                                                                                                                                                                                                  | 546   |
