# Supplementary material for: Beneficial Exercises for Cancer-Related Fatigue among Women with Breast Cancer: A Systematic Review and Network Meta-Analysis
Source: MDPI journal article supplement (doi:10.3390/cancers15010151), 2022-12-27
Supplement: s1 [file s1]

**Figure S1.** PRISMA flowchart for selected studies

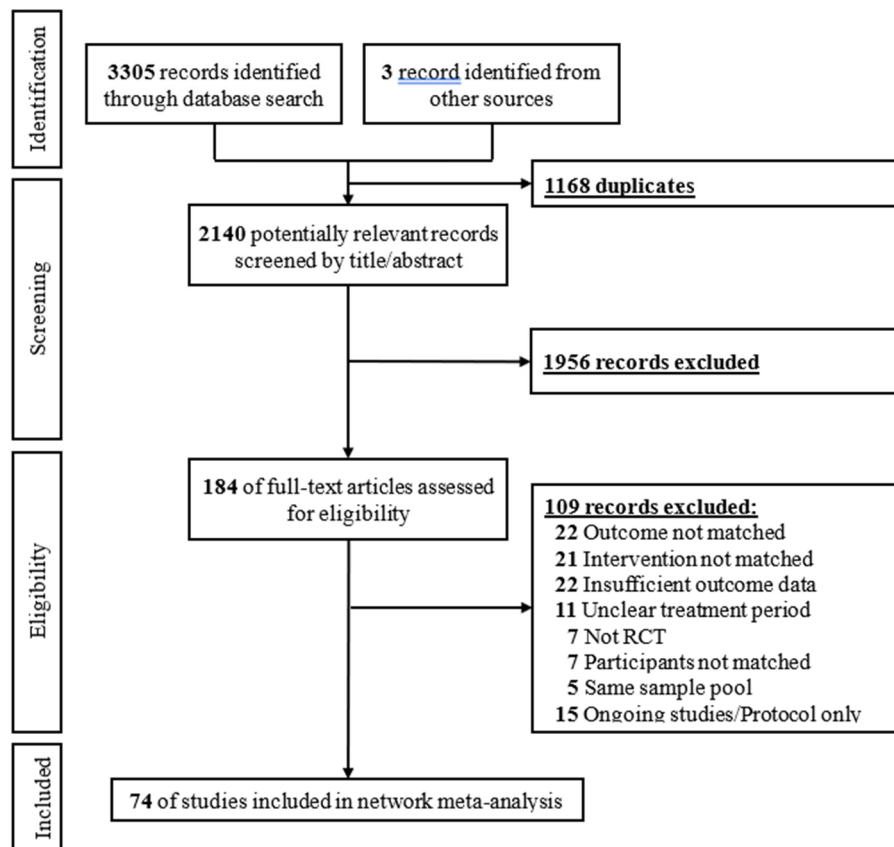

**Figure S2. RoB of included selected studies**

|                 | Study ID         | D1 | D2 | D3 | D4 | D5 | Overall |   |
|-----------------|------------------|----|----|----|----|----|---------|---|
| Inter-treatment | Al-Majid 2015    | !  | !  | +  | !  | !  | !       | + |
|                 | Battaglini 2006  | -  | !  | !  | -  | -  | -       | ! |
|                 | Bolam 2019       | +  | !  | +  | !  | +  | !       | - |
|                 | Campbell 2005    | !  | !  | !  | !  | -  | -       |   |
|                 | Cešeiko 2019     | !  | +  | +  | +  | +  | +       |   |
|                 | Chandwani 2010   | !  | !  | !  | !  | !  | !       |   |
|                 | Chandwani 2014   | !  | !  | !  | !  | +  | !       |   |
|                 | Chaoul 2018      | !  | -  | !  | !  | !  | -       |   |
|                 | Chen 2013        | !  | !  | !  | !  | +  | !       |   |
|                 | Cornette 2016    | !  | -  | !  | !  | !  | -       |   |
|                 | Courneya 2007    | +  | !  | +  | !  | !  | !       |   |
|                 | Danhauer 2015    | !  | +  | +  | +  | !  | !       |   |
|                 | Gokal 2016       | !  | !  | +  | !  | !  | !       |   |
|                 | Hu 2013          | !  | !  | !  | +  | +  | !       |   |
|                 | Huang 2019       | +  | +  | +  | +  | +  | +       |   |
|                 | Husebø 2014      | +  | !  | +  | !  | +  | !       |   |
|                 | Hwang 2008       | !  | !  | !  | !  | -  | -       |   |
|                 | Jong 2018        | !  | !  | -  | !  | !  | -       |   |
|                 | Kirkham 2020     | !  | !  | !  | !  | +  | !       |   |
|                 | Lee 2021         | +  | +  | +  | +  | +  | +       |   |
|                 | Lötzke 2016      | -  | -  | !  | !  | +  | -       |   |
|                 | Mijwel 2018      | +  | -  | -  | !  | !  | -       |   |
|                 | Mock 2005        | +  | !  | +  | !  | !  | !       |   |
|                 | Møller 2020      | !  | !  | +  | !  | +  | !       |   |
|                 | Mostafaei 2021   | +  | !  | +  | !  | +  | !       |   |
|                 | Mutrie 2007      | +  | !  | !  | !  | +  | !       |   |
|                 | Naraphong 2015   | !  | !  | +  | !  | !  | !       |   |
|                 | Schmidt 2015a    | !  | +  | +  | +  | !  | !       |   |
|                 | Schmidt 2015b    | +  | !  | !  | !  | !  | !       |   |
|                 | Steindorf 2014   | +  | +  | +  | +  | +  | +       |   |
|                 | Taso 2014        | !  | !  | +  | !  | +  | !       |   |
|                 | van Waart 2015   | !  | !  | !  | !  | +  | !       |   |
|                 | VanderWalde 2020 | +  | +  | +  | +  | +  | +       |   |
|                 | Vadiraja 2009    | +  | +  | -  | +  | !  | -       |   |
|                 | Wang 2011        | !  | !  | !  | !  | +  | !       |   |
|                 | Wang 2014        | -  | !  | !  | !  | !  | -       |   |
| Post-treatment  | Aydin 2021       | +  | +  | +  | +  | +  | +       |   |
|                 | Baglia 2019      | +  | +  | +  | +  | +  | +       |   |
|                 | Banasik 2011     | !  | !  | !  | !  | -  | -       |   |
|                 | Bower 2005       | +  | +  | !  | +  | !  | !       |   |
|                 | Carson 2009      | !  | !  | !  | !  | -  | -       |   |
|                 | Cohen 2021       | +  | !  | +  | !  | +  | !       |   |

D1 Randomisation process  
D2 Deviations from the intended interventions  
D3 Missing outcome data  
D4 Measurement of the outcome  
D5 Selection of the reported result

| Study ID             | D1 | D2 | D3 | D4 | D5 | Overall |
|----------------------|----|----|----|----|----|---------|
| Cramer 2015          | +  | !  | +  | !  | +  | !       |
| Demello 2018         | +  | +  | +  | +  | +  | +       |
| Dieli-Conwright 2018 | +  | +  | +  | +  | +  | +       |
| Do 2014              | -  | !  | -  | !  | !  | -       |
| Ergun 2013           | !  | !  | !  | !  | !  | !       |
| Gal 2021             | +  | !  | +  | !  | +  | !       |
| Hagstrom 2016        | +  | !  | !  | !  | -  | -       |
| Jang 2021            | !  | !  | !  | !  | +  | !       |
| Kiecolt-Glaser 2014  | +  | !  | !  | !  | +  | !       |
| Kim 2020             | !  | !  | +  | !  | +  | !       |
| Littman 2012         | !  | !  | !  | !  | !  | !       |
| Loh 2014             | +  | !  | !  | !  | !  | !       |
| Milne 2018           | !  | !  | +  | !  | +  | !       |
| Moraes 2021          | !  | !  | +  | !  | +  | !       |
| Natma 2015           | +  | !  | +  | !  | -  | -       |
| Naumann 2012         | !  | !  | !  | !  | -  | -       |
| Ochi 2021            | +  | +  | +  | +  | +  | +       |
| Pagola 2020          | !  | !  | +  | +  | +  | !       |
| Paulo 2019           | !  | !  | +  | +  | +  | !       |
| Pinto 2003           | !  | !  | -  | !  | -  | -       |
| Pinto 2008           | !  | !  | -  | !  | !  | -       |
| Rogers 2014          | +  | !  | +  | !  | !  | !       |
| Rogers 2017          | +  | !  | +  | !  | +  | !       |
| Saarto 2012          | +  | !  | !  | !  | +  | !       |
| Santagenello 2020    | !  | +  | !  | !  | +  | !       |
| Schmidt 2017         | +  | !  | !  | !  | !  | !       |
| Stan 2016            | !  | -  | -  | !  | -  | -       |
| Taylor 2018          | +  | -  | -  | !  | -  | -       |
| Winters-Stone 2012   | +  | !  | !  | +  | !  | !       |
| Yagli 2015           | !  | +  | +  | !  | -  | -       |
| Yali 2015            | !  | !  | !  | !  | -  | -       |
| Yuen 2007            | !  | !  | !  | !  | -  | -       |
